# Supplementary material for: Alteration of the N6-methyladenosine methylation landscape in a mouse model of polycystic ovary syndrome
Source: Springer Nature journal article supplement (doi:10.1186/s13048-023-01246-7), 2023-08-08
Supplement: MOESM2 [file 25900214]

**Supplementary Table S1** the quantification and quality of RNA in ovary tissue of a mouse

model of PCOS\*

| Sample ID | OD260/280 Ratio | OD260/230 Ratio | Conc. (ng/ $\mu$ l) | Volume ( $\mu$ l) | Quantity (ng) | QC Purity Pass or Fail |
|-----------|-----------------|-----------------|---------------------|-------------------|---------------|------------------------|
| Control 1 | 1.99            | 2.01            | 551.83              | 20                | 11036.60      | Pass                   |
| Control 2 | 1.99            | 2.37            | 676.63              | 40                | 27065.20      | Pass                   |
| Control 3 | 1.98            | 2.45            | 712.99              | 40                | 28519.60      | Pass                   |
| PCOS 1    | 1.97            | 2.41            | 795.43              | 20                | 15908.60      | Pass                   |
| PCOS 2    | 1.98            | 2.36            | 650.87              | 40                | 26034.80      | Pass                   |
| PCOS 3    | 1.96            | 2.48            | 673.65              | 40                | 26946.00      | Pass                   |

\*For spectrophotometer, the O.D. A260 /A280 ratio should be close to 2.0 for pure RNA

(ratio between 1.8 and 2.1 are acceptable). The O.D. A260/A230 ratio should be more than

1.8.

**Supplementary Table S2** The specific activity (pmol dyes per  $\mu\text{g}$  cRNA) of the labeled RNA

| Sample ID     | Dye  | Dye                 | cRNA                                           | Specific                                   | Volume ( $\mu\text{l}$ ) | Total                       |
|---------------|------|---------------------|------------------------------------------------|--------------------------------------------|--------------------------|-----------------------------|
|               | Name | pmol/ $\mu\text{l}$ | Concentration<br>( $\mu\text{g}/\mu\text{l}$ ) | Activity*(pmol<br>Dye/ $\mu\text{g}$ cRNA) |                          | Amount<br>( $\mu\text{g}$ ) |
| PCOS 1 Sup    | Cy3  | 11.93               | 0.78                                           | 15.22                                      | 10.00                    | 7.84                        |
| PCOS 2 Sup    | Cy3  | 10.15               | 0.69                                           | 14.65                                      | 10.00                    | 6.93                        |
| PCOS 3 Sup    | Cy3  | 11.78               | 0.74                                           | 15.99                                      | 10.00                    | 7.37                        |
| Control 1 Sup | Cy3  | 13.34               | 0.86                                           | 15.58                                      | 10.00                    | 8.56                        |
| Control 2 Sup | Cy3  | 12.13               | 0.79                                           | 15.28                                      | 10.00                    | 7.94                        |
| Control 3 Sup | Cy3  | 11.53               | 0.75                                           | 15.44                                      | 10.00                    | 7.47                        |
| PCOS 1 IP     | Cy5  | 4.84                | 0.41                                           | 11.79                                      | 10.00                    | 4.11                        |
| PCOS 2 IP     | Cy5  | 4.23                | 0.38                                           | 11.00                                      | 10.00                    | 3.84                        |
| PCOS 3 IP     | Cy5  | 2.88                | 0.29                                           | 9.85                                       | 10.00                    | 2.92                        |
| Control 1 IP  | Cy5  | 2.83                | 0.27                                           | 10.48                                      | 10.00                    | 2.70                        |
| Control 2 IP  | Cy5  | 4.02                | 0.38                                           | 10.48                                      | 10.00                    | 3.84                        |
| Control 3 IP  | Cy5  | 2.95                | 0.28                                           | 10.44                                      | 10.00                    | 2.83                        |

\*For two-color, if the yield is  $<825$  ng and the specific activity is  $<8.0$  pmol Cy3 or Cy5 per  $\mu\text{g}$  cRNA do not proceed to the hybridization step. Repeat cRNA preparation.

**Supplementary Table S3** Primers used in MeRIP-qPCR

| Gene        | Forward primer             | Reverse primer             | Product length (bp) |
|-------------|----------------------------|----------------------------|---------------------|
| <i>Skip</i> | 5'-CATTGCTGACTGTGCCTTCG-3' | 5'-ATAGCCCAGAGCCTTGTGCC-3' | 121                 |
